# Supplementary material for: Stereoselective oxidation of alkanes with m-CPBA as an oxidant and cobalt complex with isoindole-based ligands as catalysts
Source: Royal Society of Chemistry journal article supplement (doi:10.1039/c6ra14382b), 2016-01-01
Supplement: c6ra14382b1.pdf [file c6ra14382b1.pdf]

Electronic Supplementary Information

# Stereoselective oxidation of alkanes with *m*-CPBA as an oxidant and cobalt complex with isoindole-based ligands as a catalyst

*Oksana V. Nesterova,<sup>a</sup> Maximilian N. Kopylovich<sup>a</sup> and Dmytro S. Nesterov<sup>\*a</sup>*

<sup>a</sup> Centro de Química Estrutural, Instituto Superior Técnico, Universidade de Lisboa, Av. Rovisco Pais, 1049-001 Lisboa, Portugal

E-mail: dmytro.nesterov@tecnico.ulisboa.pt

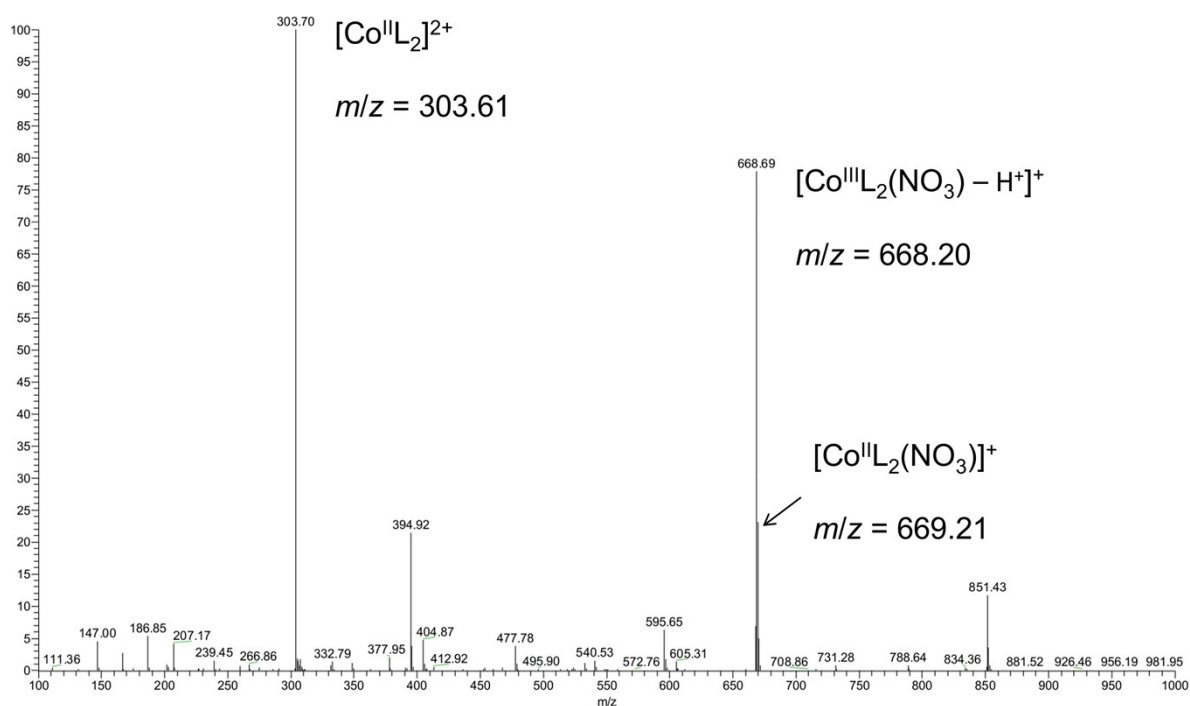

**Fig. S1** ESI-MS (+) spectrum of acetonitrile solution of **1**.

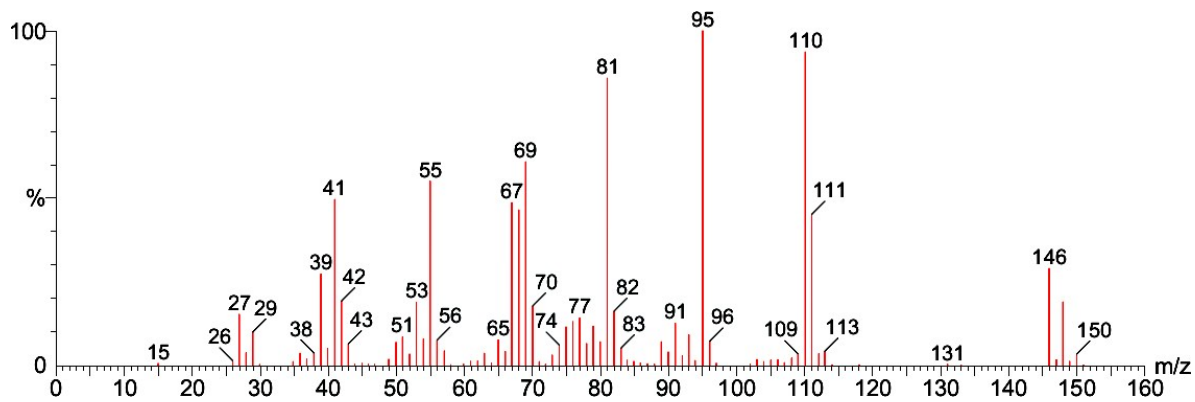

**Fig. S2** EI mass spectrum of **1**.

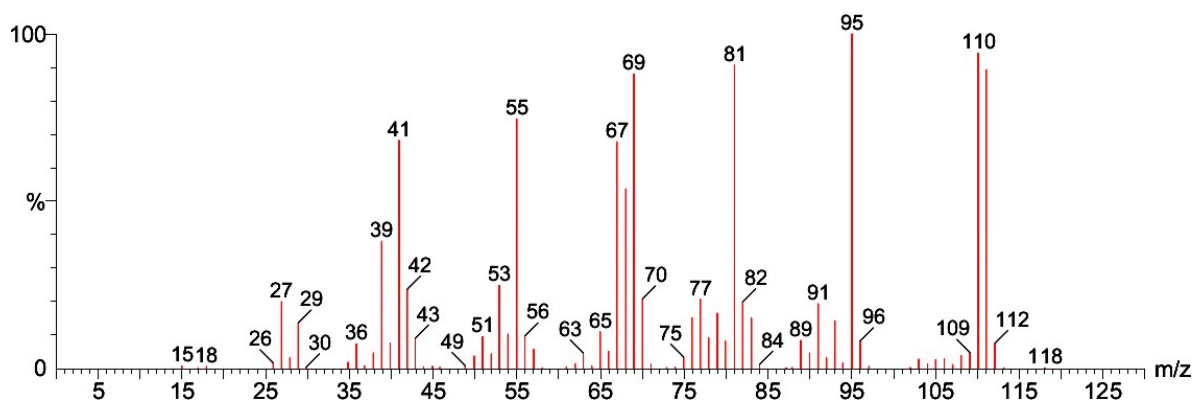

**Fig. S3** EI mass spectrum of **II**.

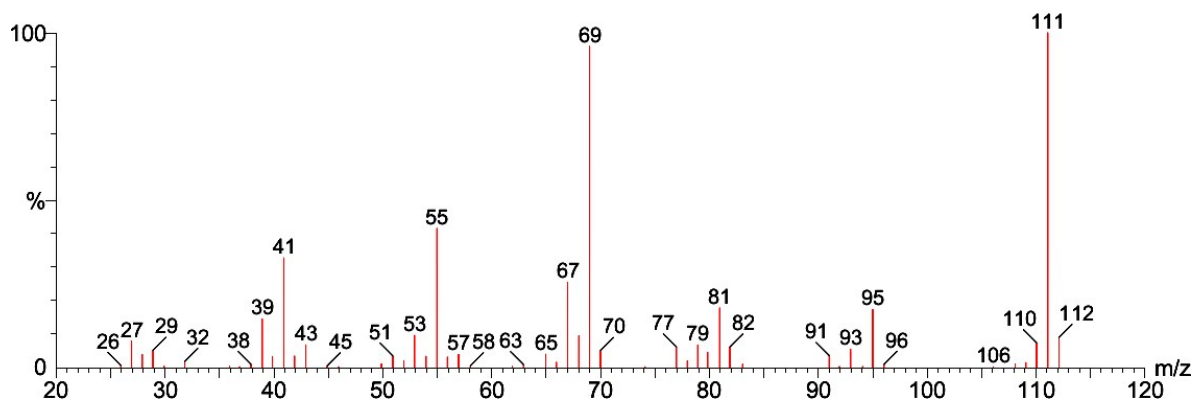

**Fig. S4** EI mass spectrum of **V**.

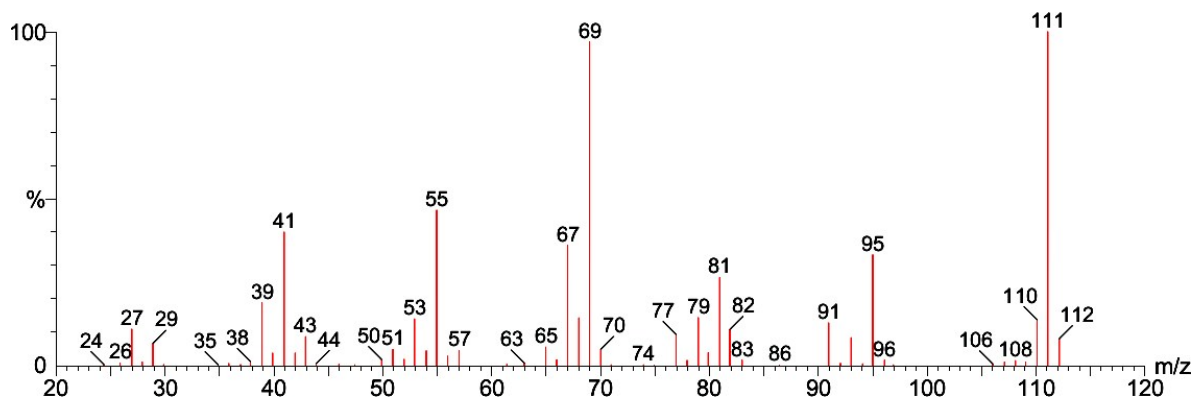

**Fig. S5** EI mass spectrum of **VI**.

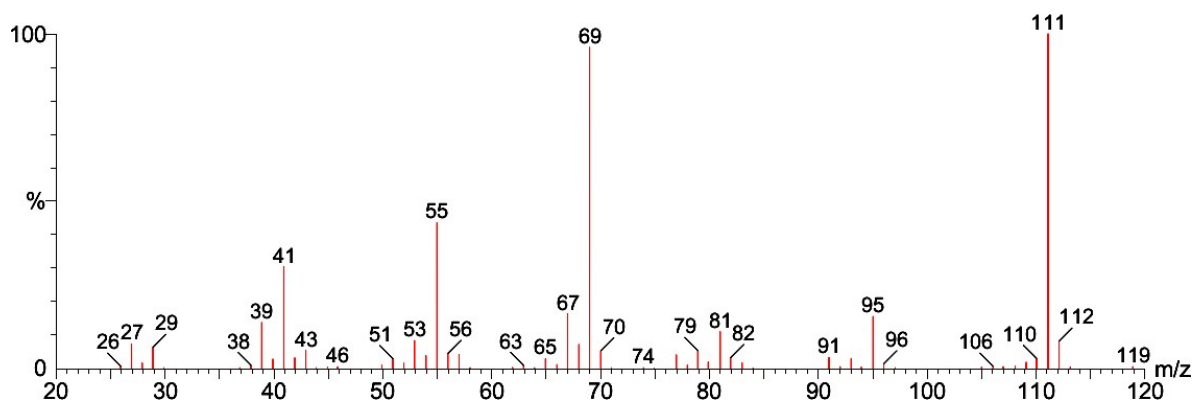

**Fig. S6** EI mass spectrum of **VII**.

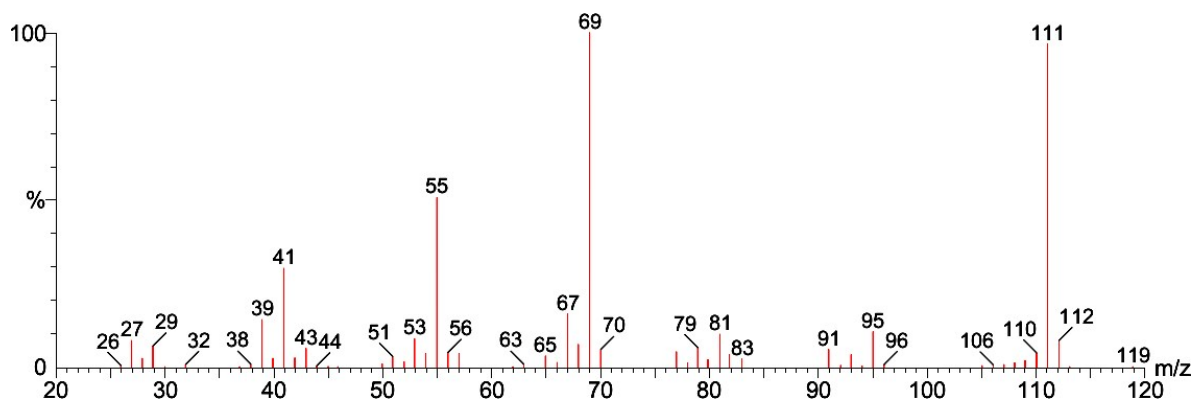

**Fig. S7** EI mass spectrum of **VIII**.

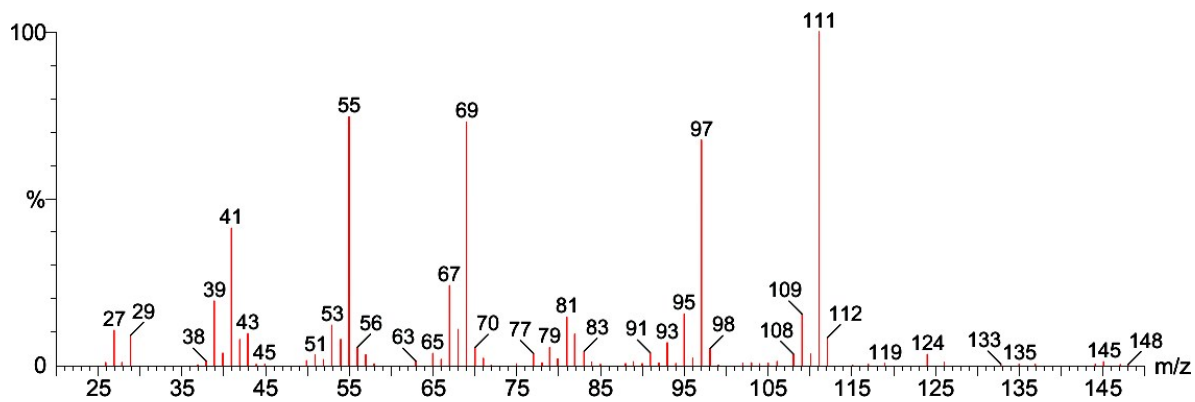

**Fig. S8** EI mass spectrum of **IX**.

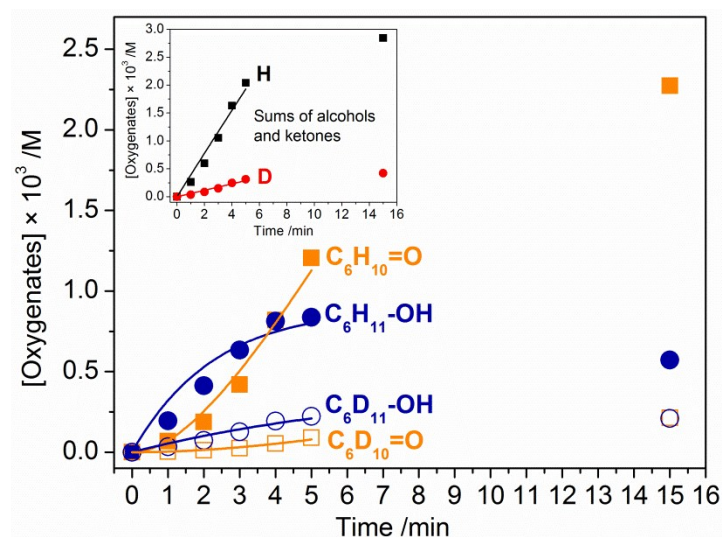

**Fig. S9** Accumulations of oxidation products (alcohols and ketones, circles and squares, respectively) over time in the oxidation of equimolar mixture (0.05 M each) of normal (solid symbols) and deuterated (open symbols) cyclohexane with *m*-CPBA (0.027 M) catalysed by complex **1** ( $3.3 \times 10^{-4}$  M) in CH<sub>3</sub>CN at 40 °C. Inset shows accumulations of sums oxidation products (alcohol and ketone) of normal (black squares) and deuterated (red circles) cyclohexane. Solid lines are the respective fits (see main text).

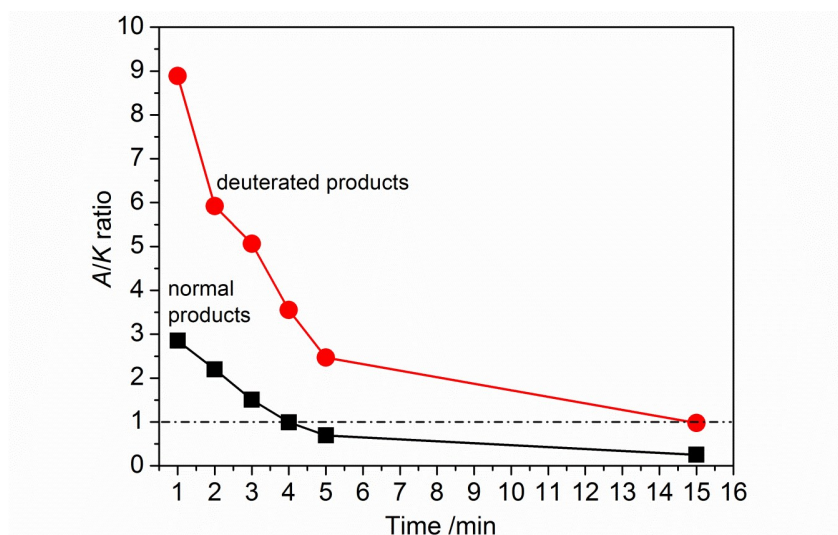

**Fig. S10** Drop of the alcohol/ketone (A/K) ratio in the course of competitive oxidation of equimolar (0.05 M each) C<sub>6</sub>H<sub>12</sub>/C<sub>6</sub>D<sub>12</sub> mixture.

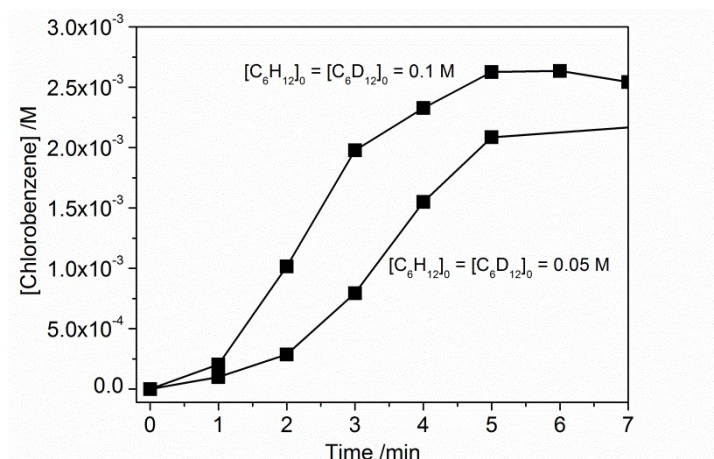

**Fig. S11** Accumulations of chlorobenzene over time in the oxidation of equimolar mixture of normal and deuterated cyclohexane with *m*-CPBA (0.027 M) catalysed by complex **1** ( $3.3 \times 10^{-4}$  M) in  $\text{CH}_3\text{CN}$  at 40 °C.

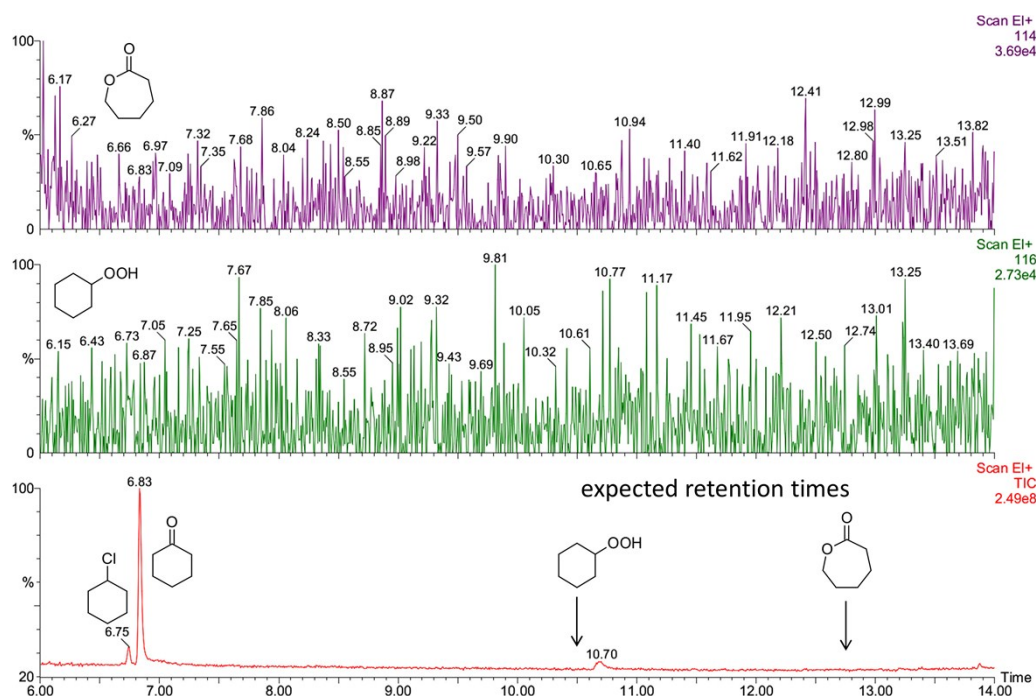

**Fig. S12** Fragment of the chromatogram showing the main products (below) in the oxidation of normal cyclohexane (0.1 M) with *m*-CPBA (0.027 M) catalysed by complex **1** ( $3.3 \times 10^{-4}$  M) in  $\text{CH}_3\text{CN}$  at 40 °C. The chromatogram was recorded after 20 min reaction time, prior addition of solid  $\text{PPh}_3$  to the sample. Mass-spectra of normal chlorocyclohexane and deuterated one (the latter obtained in a similar test, but with oxidation of  $\text{C}_6\text{D}_{12}$ ) are shown at Figs. S13. Chromatograms at top and in the middle show the intensities of 114 and 116  $m/z$  signals, corresponding to the molecular ions of  $\epsilon$ -caprolactone and cyclohexyl hydroperoxide, respectively. Mass-spectra of a normal and deuterated 10.70 min peak (not recognized) are shown at Fig. S14.

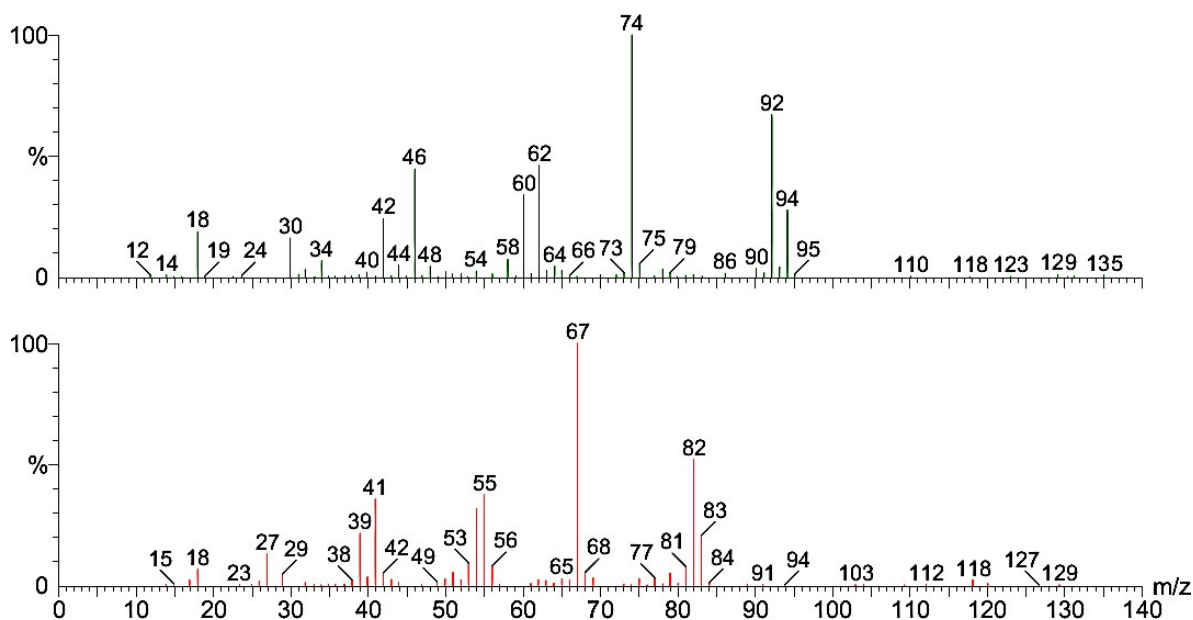

**Fig. S13** EI mass-spectra of deuterated and normal chlorocyclohexanes (above and below, respectively).

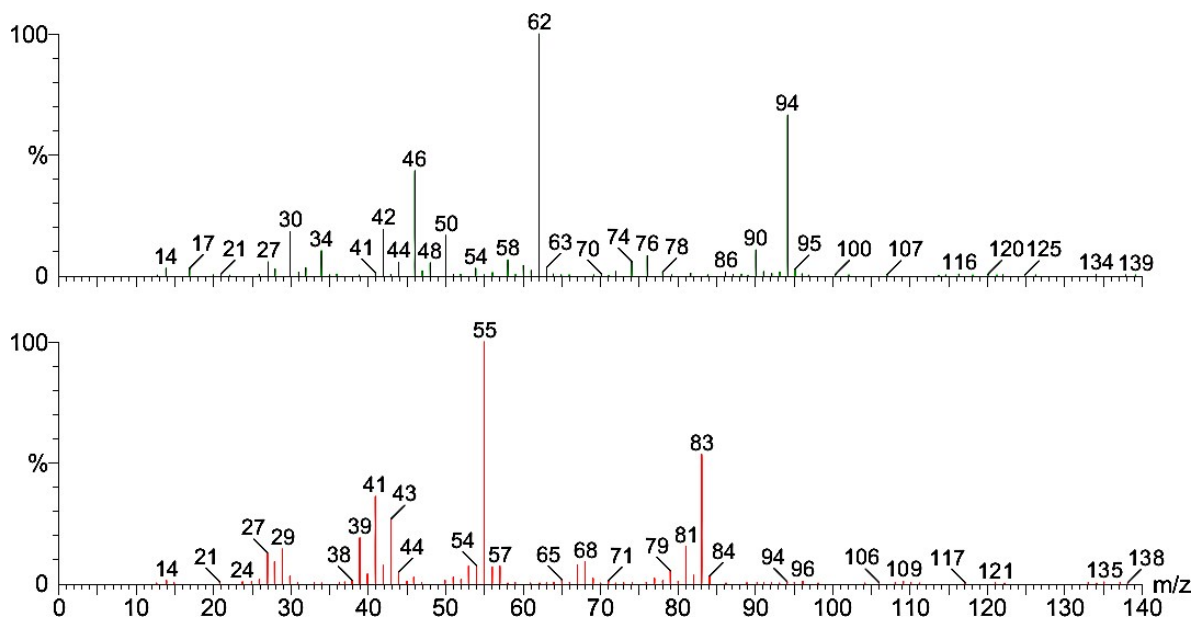

**Fig. S14** EI mass-spectra of the peak at 10.70 min (Fig. S12) obtained in the course of oxidation of normal (below) and deuterated (above) cyclohexane. The mass-spectra were not assigned to any compound from the NIST database. The shift of +11  $m/z$  between 94 and 83  $m/z$  peaks points out that the respective compound contains at least 11 hydrogen atoms, suggesting that it could be some derivative of cyclohexane. Similar spectra were observed recently in the oxidation of cyclohexane with  $H_2O_2$  catalysed by copper complexes (*New J. Chem.*, 2015, 39, 187), also not recognised.

### *Cyclohexane oxidation fitting details*

The analytical kinetic expression,<sup>40</sup> describing two-step irreversible reactions (rate constants  $k_1$  and  $k_2$ )

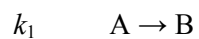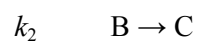

where A is cyclohexane, B is cyclohexanol and C is cyclohexanone, has the following form

$$B(t) = \frac{A_0 k_1 (e^{-k_1 t} - e^{-k_2 t})}{k_2 - k_1}$$

$$C(t) = A_0 \left( 1 - \frac{k_2 e^{-k_1 t}}{k_2 - k_1} - \frac{k_1 e^{-k_2 t}}{k_1 - k_2} \right)$$

where  $B(t)$  and  $C(t)$  are concentrations of cyclohexanol and cyclohexanone after reaction time  $t$  and  $A_0$  is the initial concentration of cyclohexane.
